# Supplementary material for: Pd/BiOBr tetragonal platelets with controllable facets by the decoration of La dopant enabling highly efficient photocatalytic activity
Source: Royal Society of Chemistry journal article supplement (doi:10.1039/d0ce01158d), 2020-01-01
Supplement: d0ce01158d1.pdf [file d0ce01158d1.pdf]

## Supporting Information

### **Pd/BiOBr tetragonal platelets with controllable facets by the decoration of La dopant enabling highly efficient photocatalytic activity**

**Xin Chen<sup>a</sup>, Kailian Zhang,<sup>a</sup> Yanming Yang,<sup>c</sup> Kai Yang,<sup>a\*</sup> Qizhe Fan,<sup>b\*</sup> Changlin Yu,<sup>b\*</sup> Weiya Huang,<sup>a</sup> Wenxin Dai<sup>d</sup>**

*a, School of Chemistry and Chemical Engineering, Jiangxi University of Science and Technology, Ganzhou 341000, Jiangxi, China*

*b, School of Chemical Engineering, Key Laboratory of Petrochemical Pollution Process and Control, Guangdong Province, Guangdong University of Petrochemical Technology, Maoming 525000, Guangdong, China*

*c, Ganzhou Intelligent Industry Innovation Research Institute, Ganzhou 341000, Jiangxi, China*

*d, Research Institute of Photocatalysis, State Key Laboratory of Photocatalysis on Energy and Environment, Fuzhou University, Fuzhou, 350002, China*

1. \*Corresponding author: Kai Yang, Ph. D. Associate Professor

Tel/Fax: +86-797-8312334

E-mail: [19979706763@126.com](mailto:19979706763@126.com)

2. \*Corresponding author: Qizhe Fan, Ph. D

Tel/Fax: ++86-668-2982253

E-mail: [lyfx210@126.com](mailto:lyfx210@126.com)

3. \*Corresponding author: Changlin Yu, Ph. D. Professor

Tel/Fax: +86-668-2982253

E-mail: [yuchanglinjx@163.com](mailto:yuchanglinjx@163.com)

## XRD

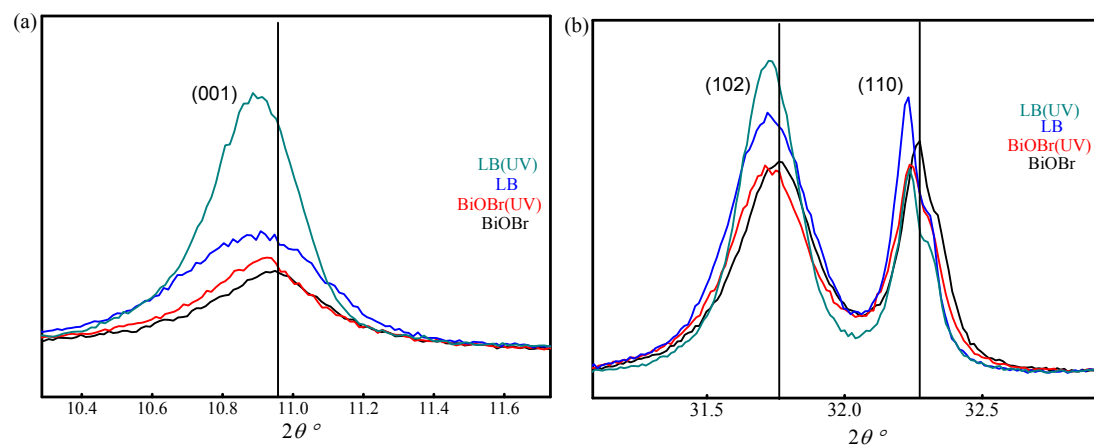

**Fig. S1** Enlarge the pattern of BiOBr, LB, BiOBr(UV), and LB (UV) (a) the peak at 10.90° corresponding (001) facet (b) at 31.72° and 32.27° corresponding (102) and (110) facets, respectively.

## SEM

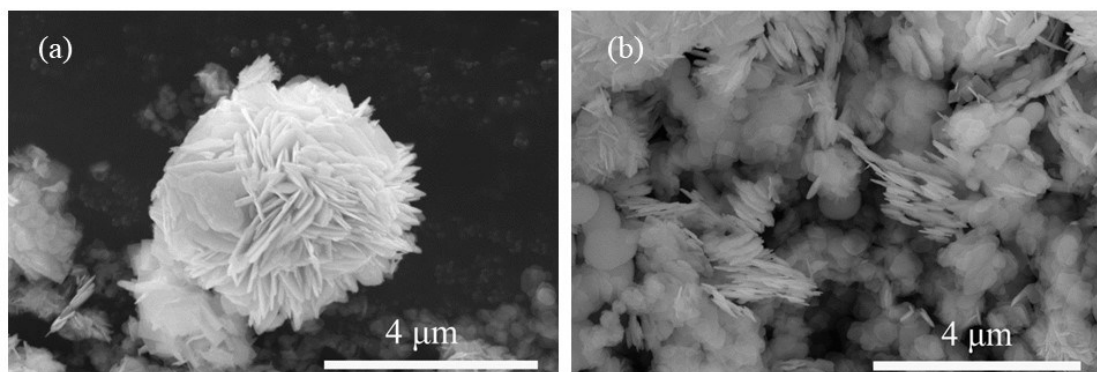

**Fig. S2** The morphology of (a)BiOBr and (b) LB.

## TEM

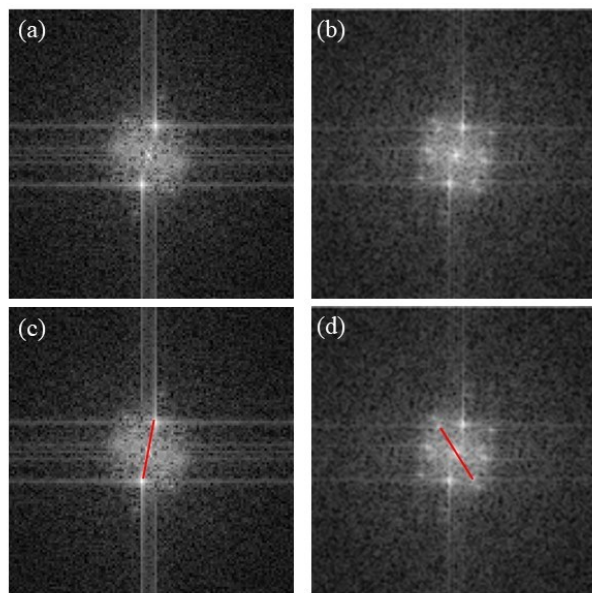

**Fig. S3** (a,b) Unmodified FFT images (c) FFT image with (110) planes (d) FFT image with (102) planes.

$$\cos \varphi = \frac{\frac{h_1 h_2 + k_1 k_2}{a^2} + \frac{l_1 l_2}{c^2}}{\sqrt{\left(\frac{h_1^2 + k_1^2}{a^2} + \frac{l_1^2}{c^2}\right) \left(\frac{h_2^2 + k_2^2}{a^2} + \frac{l_2^2}{c^2}\right)}}$$

SF(1)

## Elemental mapping images

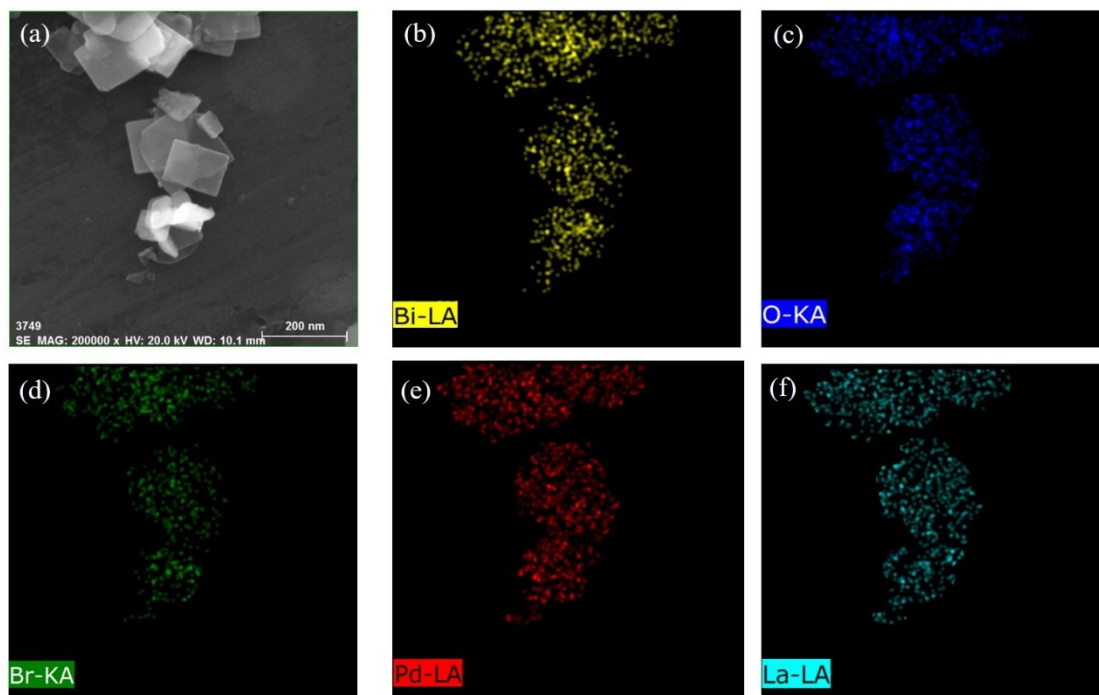

**Fig. S4** The elemental mapping images of 4%PLB. (a-f) the element mapping of 4%PLB (a) SEM image (b) Bi, (c) O, (d) Br, (e) Pd, (f) La and elements.

**UV-vis DRS**

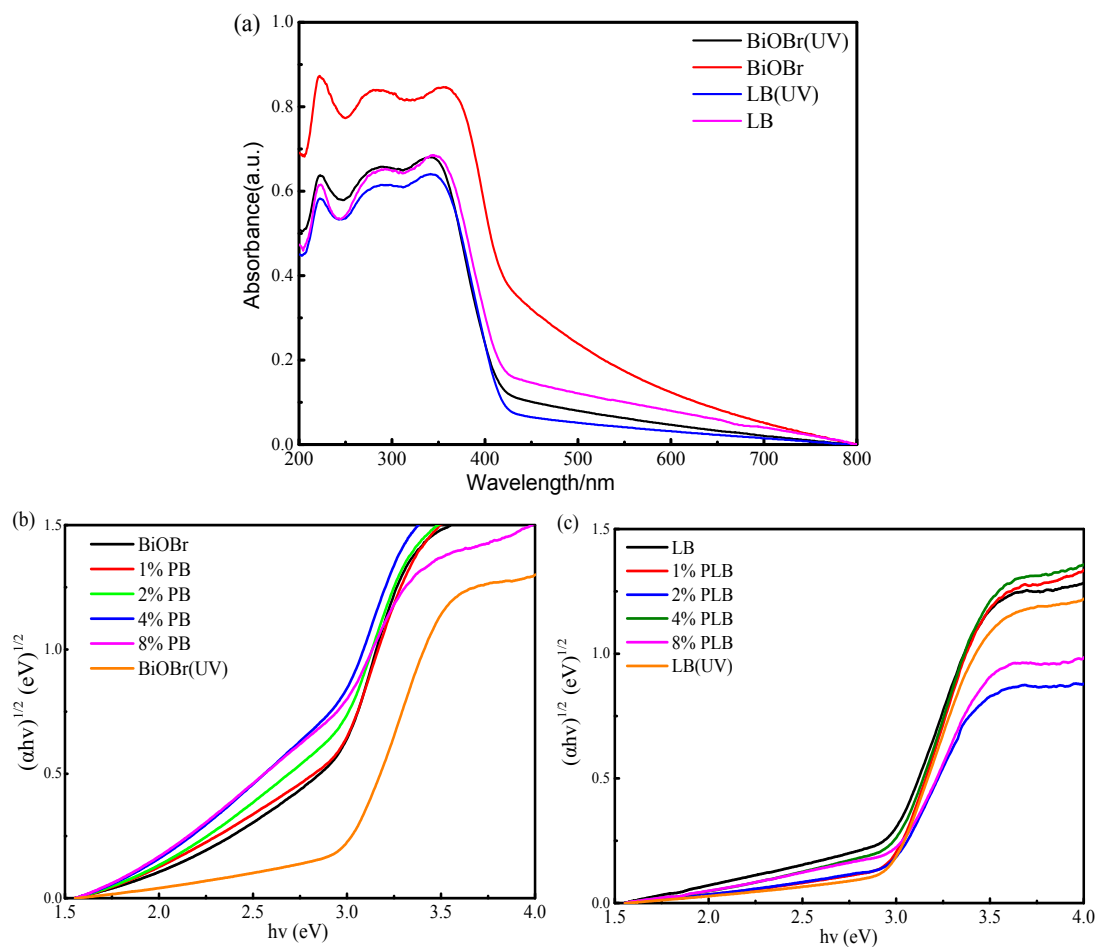

**Fig. S5** (a) UV-vis DRS spectra of BiOBr, LB, BiOBr(UV), LB(UV) and the Tauc plots of (b) x%PB (c) x%PLB as the range from 1.5-4.0 eV.

## Photocatalytic activity test

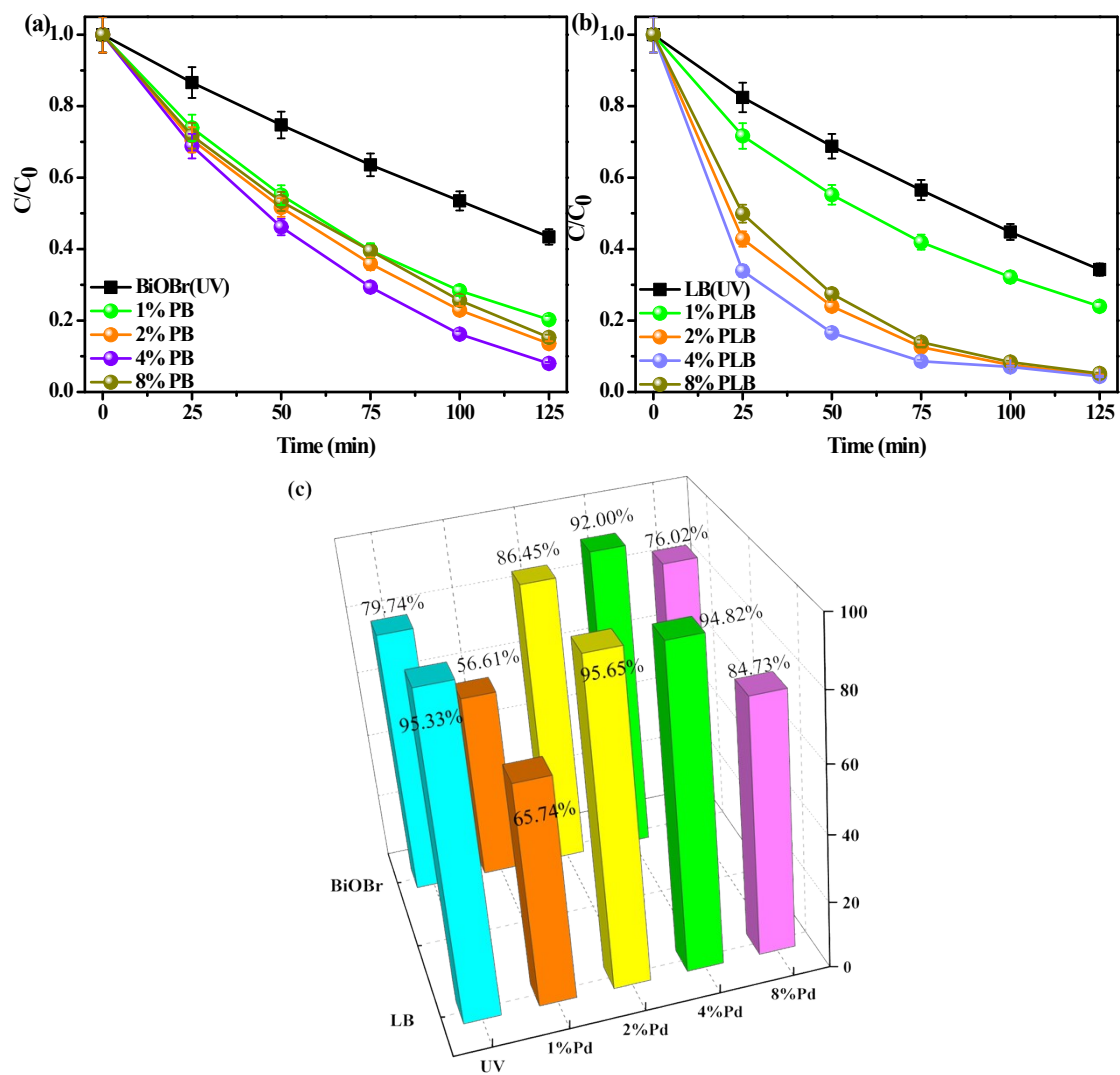

**Fig. S6** The degradation curves of the samples under UV light irradiation (a) BiOBr(UV) and x%PB (b) LB(UV) and x%PLB (c) The degradation ratio of the samples (UV means only with irradiation of UV light but not deposited Pd).

**Table S1** The basic parameters of tetragonal BiOBr in PDF card (ICDD-01-085-0862)

| Miller Index | d       | 2 $\theta$ /° | I/%  |
|--------------|---------|---------------|------|
| 001          | 8.11000 | 10.901        | 40.6 |
| 002          | 4.05500 | 21.901        | 5.7  |
| 101          | 3.52934 | 25.213        | 25.3 |
| 102          | 2.81838 | 31.723        | 100  |
| 110          | 2.77186 | 32.270        | 47.9 |
| 003          | 2.70333 | 33.111        | 3.2  |
| 111          | 2.62289 | 34.157        | 2.8  |
| 112          | 2.28832 | 39.342        | 9    |
| 103          | 2.22545 | 40.502        | 0.5  |
| 004          | 2.02750 | 44.658        | 5    |
| 200          | 1.96000 | 46.284        | 19   |
| 113          | 1.93532 | 46.909        | 7.5  |
| 201          | 1.90515 | 47.698        | 2.8  |
| 104          | 1.80088 | 50.648        | 10   |
| 202          | 1.76467 | 51.763        | 1.9  |
| 211          | 1.71350 | 53.429        | 5.4  |
| 114          | 1.63645 | 56.161        | 11.9 |
| 005          | 1.62200 | 56.707        | 0.4  |
| 212          | 1.60914 | 57.201        | 28.9 |
| 203          | 1.58681 | 58.083        | 2.3  |
| 105          | 1.49876 | 61.856        | 2.3  |
| 213          | 1.47087 | 63.162        | 0.2  |
| 204          | 1.40919 | 66.272        | 5    |
| 220          | 1.38593 | 67.532        | 4.8  |
| 221          | 1.36612 | 68.646        | 0.7  |
| 006          | 1.35167 | 69.485        | 1.6  |
| 214          | 1.32610 | 71.024        | 5.7  |
| 222          | 1.31145 | 71.941        | 0.6  |
| 301          | 1.29003 | 73.328        | 0.9  |
| 106          | 1.27783 | 74.144        | 1.7  |
| 205          | 1.24960 | 76.113        | 0.1  |
| 302          | 1.24369 | 76.540        | 5    |
| 310          | 1.23961 | 76.838        | 5.7  |
| 223          | 1.23330 | 77.303        | 0.9  |
| 311          | 1.22538 | 77.897        | 0.5  |
| 116          | 1.21491 | 78.697        | 3.3  |
| 215          | 1.19057 | 80.632        | 1.8  |
| 312          | 1.18546 | 81.052        | 1.3  |
| 303          | 1.17645 | 81.804        | 0.1  |
| 007          | 1.15857 | 83.345        | 0.2  |
| 224          | 1.14416 | 84.636        | 2.1  |

|     |         |        |     |
|-----|---------|--------|-----|
| 313 | 1.12680 | 86.254 | 1.6 |
| 206 | 1.11272 | 87.620 | 2.8 |
| 304 | 1.09833 | 89.069 | 1.3 |

**Table S2** Bandgap energy of the samples

| Samples | $E_g/eV$ | Samples   | $E_g/eV$ |
|---------|----------|-----------|----------|
| LB      | 2.87     | BiOBr     | 2.79     |
| LB(UV)  | 2.90     | BiOBr(UV) | 2.93     |
| 1%PLB   | 2.92     | 1%PB      | 2.73     |
| 2% PLB  | 2.91     | 2%PB      | 2.64     |
| 4% PLB  | 2.91     | 4%PB      | 2.67     |
| 8% PLB  | 2.90     | 8%PB      | 2.55     |

**Table S3** The flat band potential of the samples

| Samples   | Flat band potential/eV |
|-----------|------------------------|
| BiOBr(UV) | -0.45                  |
| LB(UV)    | -0.39                  |
| 4%PB      | -0.62                  |
| 4%PLB     | -0.65                  |
